# Supplementary material for: Bioinformatic Prediction of Gene Functions Regulated by Quorum Sensing in the Bioleaching Bacterium Acidithiobacillus ferrooxidans
Source: Int J Mol Sci. 2013 Aug 16;14(8):16901–16. doi: 10.3390/ijms140816901 (PMC3759942; doi:10.3390/ijms140816901)
Supplement: Supplementary file 1 [file ijms-14-16901-s001.pdf]

## Supplementary Information

**Table S1.** Characterization of selected PBSs in terms of their genomic contexts.

| PBS | HMM type | MEME motif <sup>a</sup> | Diverging ORFs | Bprom overlap <sup>b</sup> | Locus <sup>c</sup> | Gene number | Common Name <sup>d</sup>                               | Gene Symbol | Main role                                      | Subrole                                              |
|-----|----------|-------------------------|----------------|----------------------------|--------------------|-------------|--------------------------------------------------------|-------------|------------------------------------------------|------------------------------------------------------|
| 1   | SP       | NO                      | NO             | US -35                     | AFE_3112           | 1           | cytochrome c-type biogenesis protein ResB, putative    | ND          | Energy metabolism                              | Electron transport                                   |
| 2   | SP       | NO                      | NO             | -35                        | AFE_3110           | 2           | Ubiquinol-cytochrome c reductase, cytochrome b subunit | petB-1      | Energy metabolism                              | Electron transport                                   |
| 3   | SP       | NO                      | NO             | NP                         | AFE_0011           | 3           | cell division topological specificity factor MinE      | minE        | Cellular processes                             | Cell division                                        |
| 4   | SP       | NO                      | NO             | DS -10                     | AFE_2775           | 4           | membrane protein                                       | ND          | Cell envelope                                  | Other                                                |
| 5   | SP       | NO                      | YES            | US -35                     | AFE_2532           | 5           | HP <sup>f</sup>                                        |             |                                                |                                                      |
|     |          |                         |                | DS -10                     | AFE_2531           | 6           | transcriptional regulator, LysR family                 | ND          | Regulatory functions                           | DNA interactions                                     |
| 6   | SP       | NO                      | YES            | NP                         | AFE_2468           | 7           | ISAF4, transposase orf1                                | ND          | Mobile and extra-chromosomal element functions | Transposon functions                                 |
|     |          |                         |                | -35                        | AFE_2467           | 8           | acetyltransferase, GNAT family                         | ND          | Unknown function                               | Enzymes of unknown specificity                       |
| 7   | SP       | NO                      | NO             | DS -10                     | AFE_2314           | 9           | phosphohistidine phosphatase SixA                      | sixA        | Regulatory functions                           | Protein interactions                                 |
| 8   | SP       | NO                      | NO             | -10                        | AFE_2281           | 10          | phosphonate metabolism protein PhnJ                    | phnJ        | Central intermediary metabolism                | Phosphorus compounds                                 |
| 9   | SP       | NO                      | YES            | -35                        | AFE_2201           | 11          | cytosol aminopeptidase                                 | pepA        | Protein fate                                   | Degradation of proteins, peptides, and glycopeptides |
|     |          |                         |                | US -35                     | AFE_2200           | 12          | YjgP/YjgQ family protein                               | ND          | Unknown function                               | General                                              |

Table S1. Cont.

| PBS | HMM type | MEME motif <sup>a</sup> | Diverging ORFs | Bprom overlap <sup>b</sup> | Locus <sup>c</sup> | Gene number | Common Name <sup>d</sup>                     | Gene Symbol | Main role                                      | Subrole                        |
|-----|----------|-------------------------|----------------|----------------------------|--------------------|-------------|----------------------------------------------|-------------|------------------------------------------------|--------------------------------|
|     |          |                         |                |                            |                    |             |                                              |             |                                                |                                |
| 10  | SP       | NO                      | NO             | -10                        | NA <sup>g</sup>    | 13          | HP                                           |             |                                                |                                |
| 11  | SP       | NO                      | YES            | NP                         | NA                 | 14          | mcbC-like_oxidoreductase [CDD: cd02142]      |             |                                                |                                |
|     |          |                         |                | NP                         | AFE_2098           | 15          | HP                                           |             |                                                |                                |
| 12  | SP       | NO                      | NO             | -10                        | AFE_2025           | 16          | glucose-6-phosphate 1-dehydrogenase          | zwf         | Energy metabolism                              | Pentose phosphate pathway      |
| 13  | SP       | near                    | NO             | NP                         | AFE_1942           | 17          | HP                                           |             |                                                |                                |
| 14  | SP       | NO                      | NO             | DS -10                     | AFE_1399           | 18          | HP                                           |             |                                                |                                |
| 15  | SP       | NO                      | NO             | NP                         | AFE_1376           | 19          | transposon, orf2                             | ND          | Mobile and extra-chromosomal element functions | Transposon functions           |
| 16  | SP       | NO                      | NO             | DS -10                     | AFE_1247           | 20          | HP                                           |             |                                                |                                |
| 17  | SP       | near                    | NO             | DS -10                     | AFE_1055           | 21          | HP                                           |             |                                                |                                |
| 18  | SP       | OL                      | NO             | -10                        |                    |             |                                              |             |                                                |                                |
| 19  | SP       | near                    | YES            | NP                         | AFE_0999           | 22          | HP                                           |             |                                                |                                |
|     |          |                         |                | US -35                     | AFE_0998           | 23          | transcriptional regulator, putative          | ND          | Regulatory functions                           | DNA interactions               |
| 20  | SP       | NO                      | NO             | NP                         | AFE_0934           | 24          | alanyl-tRNA synthetase                       | alaS        | Protein synthesis                              | tRNA aminoacylation            |
| 21  | SP       | NO                      | NO             | NP                         | AFE_0766           | 25          | HP                                           |             |                                                |                                |
| 22  | SP       | NO                      | YES            | -10                        | AFE_0693           | 26          | sigma-54 dependent transcriptional regulator | ND          | Regulatory functions                           | DNA interactions               |
|     |          |                         |                | -10                        | AFE_0692           | 27          | oxidoreductase alpha (molybdopterin) subunit | ND          | Unknown function                               | Enzymes of unknown specificity |
| 23  | SP       | NO                      | NO             | NP                         | AFE_0655           | 28          | ABC transporter, ATP-binding protein         | ND          | Transport and binding proteins                 | Unknown substrate              |
| 24  | SP       | OL                      | NO             | US -35                     | AFE_0569           | 29          | ErfK/YbiS/YcfS/YnhG family                   | ND          | Unknown function                               | General                        |
| 25  | SP       | NO                      | NO             | DS -10                     | AFE_0404           | 30          | argininosuccinate synthase                   | argG        | Amino acid biosynthesis                        | Glutamate family               |

Table S1. Cont.

| PBS | HMM type | MEME motif <sup>a</sup> | Diverging ORFs | Bprom overlap <sup>b</sup> | Locus <sup>c</sup> | Gene number | Common Name <sup>d</sup>                                   | Gene Symbol | Main role                                                               | Subrole                             |
|-----|----------|-------------------------|----------------|----------------------------|--------------------|-------------|------------------------------------------------------------|-------------|-------------------------------------------------------------------------|-------------------------------------|
|     |          |                         |                |                            |                    |             |                                                            |             |                                                                         |                                     |
| 26  | SP       | NO                      | YES            | US -35                     | AFE_0108           | 31          | RND efflux system, outer membrane lipoprotein, NodT family | ND          | Transport and binding proteins                                          | Unknown substrate                   |
|     |          |                         |                | US -35                     | AFE_0107           | 32          | DNA-binding response regulator                             | ND          | Regulatory functions                                                    | DNA interactions                    |
| 27  | SP       | NO                      | NO             | NP                         | AFE_0105           | 33          | metal ion transporter, NRAMP family                        | ND          | Transport and binding proteins                                          | Cations and iron carrying compounds |
| 28  | SP       | NO                      | YES            | US -35                     | AFE_3191           | 34          | type III restriction-modification system, Res subunit      | ND          | DNA metabolism                                                          | Restriction/modification            |
|     |          |                         |                | -35                        | AFE_3190           | 35          | HP                                                         |             |                                                                         |                                     |
| 29  | SP       | NO                      | NO             | -10                        | AFE_3182           | 36          | transposase, interruption-N                                | ND          | Disrupted reading frame, Mobile and extra-chromosomal element functions | Transposon functions                |
| 30  | MP       | YES                     | NO             | DS -10                     | AFE_2913           | 37          | SpoVR like family protein                                  | ND          | Unknown function                                                        | General                             |
| 31  | MP       | YES                     | NO             | -35                        | AFE_2803           | 38          | FMN reductase, NADPH-dependent                             | ND          | Unknown function                                                        | Enzymes of unknown specificity      |
| 32  | MP       | NO                      | NO             | -10                        | AFE_2789           | 39          | HP                                                         |             |                                                                         |                                     |
| 33  | MP       | YES                     | NO             | NP                         | AFE_2778           | 40          | HP                                                         |             |                                                                         |                                     |
| 34  | MP       | YES                     | YES            | -10                        | AFE_2294           | 41          | ABC transporter, ATP-binding protein, authentic frameshift | ND          | Transport and binding proteins                                          | Unknown substrate                   |
|     |          |                         |                | NP                         | AFE_2292           | 42          | TonB-dependent receptor                                    | ND          | Transport and binding proteins                                          | Cations and iron carrying compounds |
| 35  | MP       | YES                     | NO             | NP                         | AFE_2130           | 43          | virulence-associated protein, putative                     | ND          | Cellular processes                                                      | Pathogenesis                        |
| 36  | MP       | YES                     | NO             | NP                         | AFE_2100           | 44          | HP                                                         |             |                                                                         |                                     |

Table S1. Cont.

| PBS | HMM type | MEME motif <sup>a</sup> | Diverging ORFs | Bprom overlap <sup>b</sup> | Locus <sup>c</sup> | Gene number | Common Name <sup>d</sup>                     | Gene Symbol | Main role                       | Subrole                                                                          |
|-----|----------|-------------------------|----------------|----------------------------|--------------------|-------------|----------------------------------------------|-------------|---------------------------------|----------------------------------------------------------------------------------|
| 37  | MP       | YES                     | NO             | NP                         | AFE_1833           | 45          | RNA polymerase sigma-70 factor family        | ND          | Transcription                   | Transcription factors                                                            |
| 38  | MP       | YES                     | NO             | DS -10                     | AFE_1694           | 46          | transfer protein                             | ND          | Cellular processes              | Conjugation                                                                      |
| 39  | MP       | YES                     | NO             | DS -10                     | AFE_1587           | 47          | HP                                           |             |                                 |                                                                                  |
| 40  | MP       | YES                     | NO             | DS -10                     | AFE_1354           | 48          | glycosyl transferase, group 1 family protein | ND          | Cell envelope                   | Biosynthesis and degradation of surface polysaccharides and lipo-polysaccharides |
| 41  | MP       | NO                      | NO             | -35                        |                    |             | sigma-54 dependent transcriptional regulator | ND          | Regulatory functions            | DNA interactions                                                                 |
| 42  | MP       | YES                     | YES            | -35                        | AFE_0957           | 49          | metallo-beta-lactamase family protein        | ND          | Unknown function                | Enzymes of unknown specificity                                                   |
|     |          |                         |                | US -35                     | AFE_0956           | 50          | HP                                           |             |                                 |                                                                                  |
| 43  | MP       | YES                     | NO             | -10                        | AFE_0952           | 51          | transcription termination factor Rho         | rho         | Transcription                   | Transcription factors                                                            |
| 44  | MP       | NO                      | NO             | -10                        | AFE_0658           | 52          | HP                                           |             |                                 |                                                                                  |
| 45  | MP       | YES                     | NO             | NP                         | AFE_0582           | 53          | membrane protein, putative                   | ND          | Cell envelope                   | Other                                                                            |
| 46  | MP       | near                    | NO             | DS -10                     | AFE_0577           | 54          | thiol:disulfide interchange protein DsbD     | dsbD        | Energy metabolism, Protein fate | Electron transport, Protein folding and stabilization                            |
| 47  | MP       | NO                      | YES            | NP                         | AFE_0545           | 55          | conserved hypothetical protein               | ND          | Hypothetical proteins           | Conserved                                                                        |
|     |          |                         |                | US -35                     | AFE_0544           | 56          | HP                                           |             |                                 |                                                                                  |
| 48  | MP       | YES                     | NO             | -35                        | AFE_0464           | 57          | tRNA pseudouridine synthase B                | truB        | Protein synthesis               | tRNA and rRNA base modification                                                  |
| 49  | MP       | YES                     | NO             | NP                         | AFE_0393           | 58          |                                              |             |                                 |                                                                                  |

Table S1. Cont.

| PBS | HMM type | MEME motif <sup>a</sup> | Diverging ORFs | Bprom overlap <sup>b</sup> | Locus <sup>c</sup> | Gene number | Common Name <sup>d</sup>                            | Gene Symbol | Main role                                          | Subrole                                                                                                                     |
|-----|----------|-------------------------|----------------|----------------------------|--------------------|-------------|-----------------------------------------------------|-------------|----------------------------------------------------|-----------------------------------------------------------------------------------------------------------------------------|
| 50  | MP       | YES                     | NO             | -35                        | AFE_0269           | 59          | metallo-beta-lactamase family protein               | ND          | Unknown function                                   | Enzymes of unknown specificity                                                                                              |
| 51  | MP       | YES                     | NO             | NP                         | AFE_0251           | 60          | ribonuclease T                                      | rnt         | Transcription                                      | RNA processing                                                                                                              |
| 52  | MP       | YES                     | NO             | DS -10                     | AFE_0241           | 61          | RNA methyltransferase, TrmH family, group 2         | ND          | Protein synthesis                                  | tRNA and rRNA base modification                                                                                             |
| 53  | MP       | YES                     | NO             | DS -10                     | AFE_0233           | 62          | glycosyl transferase, group 2 family protein        | ND          | Cell envelope                                      | Biosynthesis and degradation of surface polysaccharides and lipo-polysaccharides                                            |
| 54  | MP       | YES                     | NO             | -10                        | AFE_0161           | 63          | toluene tolerance protein, putative                 | ND          | Cellular processes                                 | Detoxification                                                                                                              |
| 55  | MP       | YES                     | YES            | US -35                     | AFE_0153           | 64          | integral membrane protein                           | ND          | Cell envelope                                      | Other                                                                                                                       |
|     |          |                         |                | -10                        | AFE_0152           | 65          |                                                     |             |                                                    |                                                                                                                             |
| 56  | MP       | YES                     | NO             | NP                         | AFE_0056           | 66          | aspartyl-tRNA synthetase                            | aspS        | Protein synthesis                                  | tRNA aminoacylation                                                                                                         |
| 57  | MP       | YES                     | NO             | US -35                     | AFE_3128           | 67          | HP                                                  |             |                                                    |                                                                                                                             |
| 58  | MP       | NO                      | YES            | -35                        | AFE_2638           | 68          | ribonucleotide-diphosphate reductase, alpha subunit | nrdA        | Purines, pyrimidines, nucleosides, and nucleotides | 2'-Deoxy-ribonucleotide metabolism                                                                                          |
|     |          |                         |                | DS -10                     | AFE_2637           | 69          | tldD protein                                        | tldD        | Regulatory functions                               | Other                                                                                                                       |
| 59  | MP       | NO                      | NO             | DS -10                     | AFE_1339           | 70          | polysaccharide biosynthesis/export domain protein   | ND          | Cell envelope; Transport and binding proteins      | Biosynthesis and degradation of surface polysaccharides and lipo-polysaccharide; Carbohydrates, organic alcohols, and acids |

Table S1. Cont.

| PBS | HMM type | MEME motif <sup>a</sup> | Diverging ORFs | Bprom overlap <sup>b</sup> | Locus <sup>c</sup> | Gene number | Common Name <sup>d</sup>                                   | Gene Symbol | Main role            | Subrole             |
|-----|----------|-------------------------|----------------|----------------------------|--------------------|-------------|------------------------------------------------------------|-------------|----------------------|---------------------|
|     |          |                         |                |                            |                    |             |                                                            |             |                      |                     |
| 60  | MP       | NO                      | YES            | DS -10                     | AFE_0852           | 71          | HP                                                         |             |                      |                     |
|     |          |                         |                | -35                        | AFE_0851           | 72          | translation elongation factor P                            | efp         | Protein synthesis    | Translation factors |
| 61  | MP       | NO                      | NO             | NP                         | AFE_0666           | 73          | YCII-related domain protein                                | ND          | Unknown function     | General             |
| 62  | MP-LP    | YES                     | YES            | -35                        | AFE_1998           | 74          | HP                                                         |             |                      |                     |
|     |          |                         |                | -35                        | AFE_1997           | 75          | autoinducer-binding transcriptional regulator, LuxR family | ND          | Regulatory functions | DNA interactions    |

<sup>a</sup> Selected PBSs sequences with additional flanking 80 bp regions in each side were used as inputs for the search of common motifs using the Multiple Em for Motif Elicitation (MEME) tool (Timothy *et al.* 1994). “NO” means that no motif was found by MEME. “YES” means that MEME identified the corresponding PBS as the common motif. “near” means that the common motif was found within the input sequence but it is not the corresponding PBS. “OL” means that the common motif overlaps the corresponding PBS but is not the same sequence. <sup>b</sup> Selected PBSs sequences with additional flanking 100 bp regions in each side were used as inputs for the search of putative  $\sigma^{70}$  consensus promoters using the Bprom prediction tool (www.softberry.com). “-35” means that PBS overlapped the predicted -35 element. “-10” means that PBS overlapped the predicted -10 element. “DS -10” means that the corresponding PBS was located downstream of the -10 element. “US -35” means that the corresponding PBS was located upstream of the -35 element. “NP” means that there was no prediction of  $\sigma^{70}$  promoter. <sup>c</sup> ORF identity assigned as in NCBI Reference Sequence: NC\_011761.1. “NA” means that the ORF was not annotated as such in the list. <sup>d</sup> Gene product identity assigned by JCVI-CMR. “HP” means that the product is an hypothetical protein or a conserved hypothetical protein. <sup>e</sup> Gene symbol assigned by JCVI-CMR. “ND” means no data. <sup>f</sup> Hypothetical proteins do not have main or subrole assignments. <sup>g</sup> Non Applicable. These correspond to non-annotated ORFs. They were manually curated. If putative conserved domains were detected, the highest scored one is indicated. The coordinates of the ORFs are also indicated between parentheses.
